# Supplementary material
Source: Springer Nature journal article supplement (https://www.springermedizin.de/resource/supplementary/12916_2012_792_MOESM11_ESM.pdf/9598688)

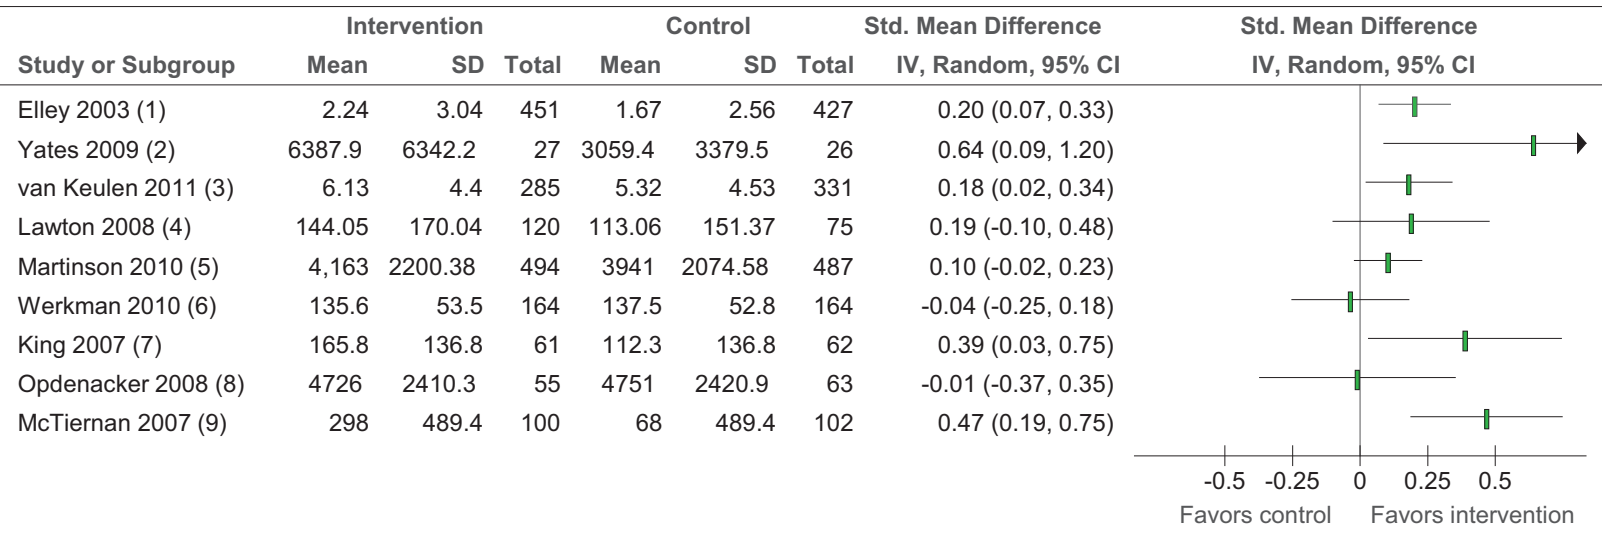

- (1) 1 contact
- (2) 1 contact
- (3) 6 contacts
- (4) 7 contacts
- (5) 7 contacts
- (6) 15 contacts
- (7) 16 contacts
- (8) 23 contacts
- (9) 156 contacts

Supplement: MOESM11 [file 9598688]
